# Supplementary material for: Determination of the influence of water on the SO3 + CH3OH reaction in the gas phase and at the air–water interface
Source: Royal Society of Chemistry journal article supplement (doi:10.1039/d3cp01245j), 2023-01-01
Supplement: d3cp01245j5.pdf [file d3cp01245j5.pdf]

## Supporting information

-for-

### Determination of the influence of water on the $\text{SO}_3 + \text{CH}_3\text{OH}$ reaction in the gas phase and at the air-water interface

Chao Ding<sup>a,‡</sup>, Yang Cheng<sup>a,‡</sup>, Hui Wang<sup>a</sup>, Jihuan Yang<sup>a</sup>, Zeyao Li<sup>a</sup>, Makroni Lily<sup>b,\*</sup>  
Rui Wang<sup>a</sup>, Tianlei Zhang<sup>a,\*</sup>

<sup>a</sup> Institute of Theoretical and Computational Chemistry, Shaanxi Key Laboratory of Catalysis, School of Chemical & Environment Science, Shaanxi University of Technology, Hanzhong, Shaanxi 723001, P. R. China

<sup>b</sup> Environmental Research Institute, Shandong University, Qingdao, Shandong 266237, P. R. China

| S. NO | Caption                                                                                                                                                                                                                                                                                                                                                                                                                                                                                                                                                                                                                                                                                                          |
|-------|------------------------------------------------------------------------------------------------------------------------------------------------------------------------------------------------------------------------------------------------------------------------------------------------------------------------------------------------------------------------------------------------------------------------------------------------------------------------------------------------------------------------------------------------------------------------------------------------------------------------------------------------------------------------------------------------------------------|
| S3    | <b>Fig. S1</b> Schematic potential energy surface for the $\text{SO}_3 + \text{CH}_3\text{OH} \rightarrow \text{CH}_3\text{OSO}_3\text{H}$ reaction                                                                                                                                                                                                                                                                                                                                                                                                                                                                                                                                                              |
| S4    | <b>Fig. S2</b> Schematic energy diagrams for the hydrolysis of $\text{SO}_3$ without (a) and with $\text{H}_2\text{O}$ (b), as well as $\text{CH}_3\text{OH}$ -assisted $\text{SO}_3 + \text{CH}_3\text{OH} \rightarrow \text{CH}_3\text{OSO}_3\text{H}$ reaction (c) at the CCSD(T)-F12/cc-pVDZ-F12//M06-2X/6-311+G(2df,2pd) level of theory                                                                                                                                                                                                                                                                                                                                                                    |
| S5-S6 | <b>Table S1</b> Relative energies ( $\Delta E$ and $\Delta(E + \text{ZPE})/(\text{kcal}\cdot\text{mol}^{-1})$ ), enthalpies ( $\Delta H/(\text{kcal}\cdot\text{mol}^{-1})$ ), entropy ( $S(298\text{ K})/(\text{cal}\cdot\text{mol}^{-1}\cdot\text{K}^{-1})$ ) and free energies ( $\Delta G(298\text{ K})/(\text{kcal}\cdot\text{mol}^{-1})$ ) for the reactants, intermediates, transition states and products involved in the $\text{SO}_3 + \text{CH}_3\text{OH} \rightarrow \text{CH}_3\text{OSO}_3\text{H}$ reaction without and with $\text{H}_2\text{O}$ and $\text{CH}_3\text{OH}$ as well as the hydrolysis reaction of $\text{SO}_3$ without and with $\text{H}_2\text{O}$ and $\text{CH}_3\text{OH}$ |
| S7    | <b>Table S2</b> Equilibrium constants ( $\text{cm}^3\cdot\text{molecule}^{-1}$ ) for $\text{SO}_3\cdots\text{CH}_3\text{OH}$ , $\text{SO}_3\cdots\text{H}_2\text{O}$ , $\text{CH}_3\text{OH}\cdots\text{H}_2\text{O}$ , $(\text{H}_2\text{O})_2$ and $\text{SO}_3\cdots(\text{H}_2\text{O})_2$ within the altitude range of 0-15 km                                                                                                                                                                                                                                                                                                                                                                              |
| S8    | <b>Table S3</b> The high-pressure limiting rate constants for the reactants to pre-reactive complex process calculated by master equation within the temperature range of 213-320 K                                                                                                                                                                                                                                                                                                                                                                                                                                                                                                                              |
| S9    | <b>Table S4</b> Rate coefficient ( $\text{cm}^3\cdot\text{molecules}^{-1}\cdot\text{s}^{-1}$ ) of $\text{SO}_3 + \text{CH}_3\text{OH}$ , $\text{SO}_3\cdots\text{CH}_3\text{OH} + \text{CH}_3\text{OH}$ , $\text{SO}_3 + \text{H}_2\text{O}$ and $\text{SO}_3\cdots\text{H}_2\text{O} + \text{H}_2\text{O}$ reactions within the altitude range of 0-50 km                                                                                                                                                                                                                                                                                                                                                       |
| S10   | <b>Fig. S3</b> The optimized geometrical structure for $\text{CH}_3\text{OSO}_3^-$ ion at the M06-2X/6-311+G(2df,2pd) level                                                                                                                                                                                                                                                                                                                                                                                                                                                                                                                                                                                      |
| S11   | <b>Fig. S4</b> The simulated trajectories of $\text{SO}_3 + \text{CH}_3\text{OH}$ reaction (a), $\text{SO}_3 + \text{H}_2\text{O}$ reaction (b), $\text{H}_2\text{O}$ -assisted $\text{SO}_3 + \text{CH}_3\text{OH}$ reaction (c) and $\text{CH}_3\text{OH}$ -assisted $\text{SO}_3 + \text{H}_2\text{O}$ reaction (d) in the gas phase                                                                                                                                                                                                                                                                                                                                                                          |
| S12   | <b>Fig. S5</b> The simulated trajectories of the $\text{CH}_3\text{OSO}_3\cdots\text{H}_3\text{O}^+$ ion pair formation from $\text{SO}_3$ , $\text{CH}_3\text{OH}$ and an interfacial water molecule at the air-water interface                                                                                                                                                                                                                                                                                                                                                                                                                                                                                 |
| S13   | <b>Fig. S6</b> The simulated trajectories of the $\text{CH}_3\text{OSO}_3\cdots\text{H}_3\text{O}^+$ ion pair formation from $\text{SO}_3$ , $\text{CH}_3\text{OH}$ and two interfacial water molecular at the air-water interface                                                                                                                                                                                                                                                                                                                                                                                                                                                                               |
| S14   | <b>Fig. S7</b> The simulated trajectories of the $\text{HSO}_4^-$ and $\text{H}_3\text{O}^+$ ions formation from $\text{SO}_3$ , $\text{CH}_3\text{OH}$ and an interfacial water molecule at the air-water interface                                                                                                                                                                                                                                                                                                                                                                                                                                                                                             |
| S15   | <b>Fig. S8</b> The simulated trajectories of the $\text{HSO}_4^-$ and $\text{H}_3\text{O}^+$ ions formation from $\text{SO}_3$ , $\text{CH}_3\text{OH}$ and two interfacial water molecules at the air-water interface                                                                                                                                                                                                                                                                                                                                                                                                                                                                                           |

\* Corresponding authors. Tel: +86-0916-2641083, Fax: +86-0916-2641083.  
E-mail: lilymakroni@outlook.com (M. Lily); ztianlei88@163.com (T. L. Zhang).

‡ Chao Ding and Yang Cheng have contributed equally to this work.

---

|     |                                                                                                                                                                                                                                                                                                                                                                                      |
|-----|--------------------------------------------------------------------------------------------------------------------------------------------------------------------------------------------------------------------------------------------------------------------------------------------------------------------------------------------------------------------------------------|
| S16 | <b>Table S5</b> Coordinates stationary points for the $\text{SO}_3 + \text{CH}_3\text{OH} \rightarrow \text{CH}_3\text{OSO}_3\text{H}$ reaction without and with $\text{H}_2\text{O}$ and $\text{CH}_3\text{OH}$ as well as the hydrolysis reaction of $\text{SO}_3$ without and with $\text{H}_2\text{O}$ and $\text{CH}_3\text{OH}$ at the M06-2X/6-311+G(2df,2pd) level of theory |
|-----|--------------------------------------------------------------------------------------------------------------------------------------------------------------------------------------------------------------------------------------------------------------------------------------------------------------------------------------------------------------------------------------|

---

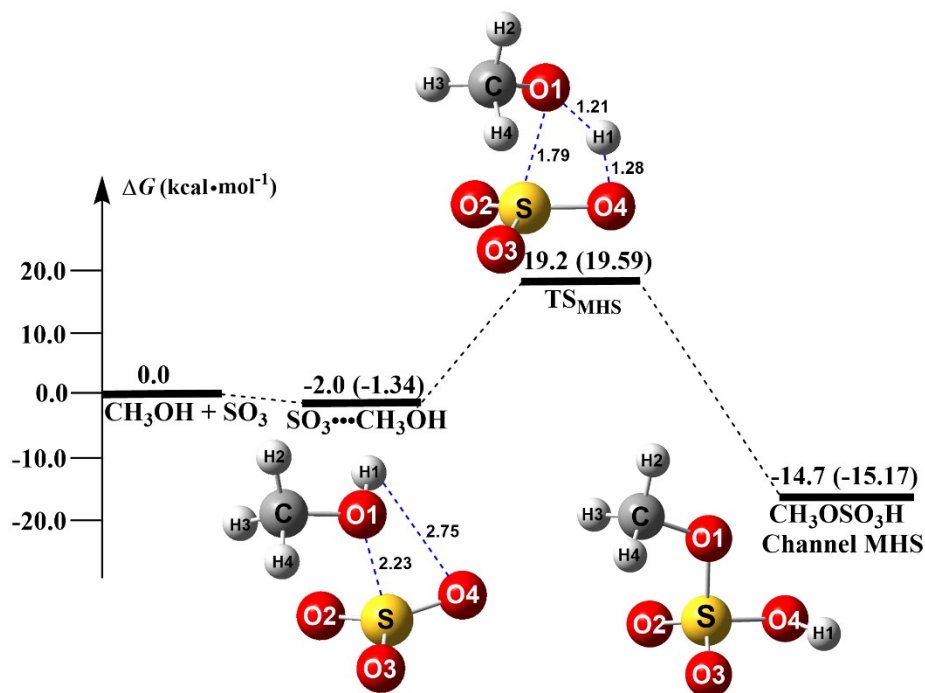

**Fig. S1** Schematic potential energy surface for the  $\text{SO}_3 + \text{CH}_3\text{OH} \rightarrow \text{CH}_3\text{OSO}_3\text{H}$  reaction (Distance are in angstroms at the M06-2X/6-311+G(2df,2pd) level of theory. The energy values correspond to calculations at the CCSD(T)-F12/cc-pVDZ-F12//M06-2X/6-311+G(2df,2pd) level; The values in parentheses are taken from reference 2)

The formation of  $\text{CH}_3\text{OSO}_3\text{H}$  (MHS) from the  $\text{SO}_3 + \text{CH}_3\text{OH}$  reaction has been studied theoretically before by several groups<sup>1,2</sup>. Herein, this reaction has been reinvestigated at the CCSD(T)-F12/cc-pVDZ-F12//M06-2X/6-311+G(2df,2pd) level to evaluate the catalytic effect of water molecule in the gas phase and at the air-water interface. As seen in Fig. S1, starting from the  $\text{SO}_3 + \text{CH}_3\text{OH}$  reactants, a four-membered ring  $\text{SO}_3 \cdots \text{CH}_3\text{OH}$  complex was formed with a binding Gibbs free energy of  $2.0 \text{ kcal}\cdot\text{mol}^{-1}$ , which was good agreement with complex R-a reported by Liu et al<sup>2</sup> geometrically and energetically. After  $\text{SO}_3 \cdots \text{CH}_3\text{OH}$  complex, the reaction proceeded through transition state TS with the Gibbs free energy barrier of  $21.2 \text{ kcal}\cdot\text{mol}^{-1}$ , and formed the product MHS, which was calculated to be  $12.7 \text{ kcal}\cdot\text{mol}^{-1}$  more stable than  $\text{SO}_3 \cdots \text{CH}_3\text{OH}$ . As for  $\text{TS}_{\text{MHS}}$  and MHS, their calculated geometries and relative free energies were consistent with previous studies reported by Shen et al.<sup>1</sup> and Liu et al.<sup>2</sup> Within the altitude range of 0-15 km, the rate coefficients for the  $\text{SO}_3 + \text{CH}_3\text{OH} \rightarrow \text{CH}_3\text{OSO}_3\text{H}$  reaction listed in Table S4 were calculated to be  $3.98 \times 10^{-20} - 5.40 \times 10^{-20} \text{ cm}^3\cdot\text{molecules}^{-1}\cdot\text{s}^{-1}$  by using master equation. At 298 K, the calculated rate coefficient of the  $\text{SO}_3 + \text{CH}_3\text{OH} \rightarrow \text{CH}_3\text{OSO}_3\text{H}$  reaction was  $5.40 \times 10^{-20} \text{ molecules}\cdot\text{cm}^{-3}\cdot\text{s}^{-1}$ , which agreed with previously calculated value<sup>2</sup> ( $1.20 \times 10^{-19} \text{ molecules}\cdot\text{cm}^{-3}\cdot\text{s}^{-1}$ ).

## Reference

- [1] G. Shen, M. Suto and L. C. Lee, *Int. J. Chem. Kinet.*, 1990, **22**, 633-639.
- [2] L. Liu, J. Zhong, H. Vehkamäki, T. Kurtén, L. Du, X. Zhang, J. S. Francisco and X. C. Zeng, *Proc. Natl. Acad. Sci. U. S. A.*, 2019, **116**, 24966-24971.

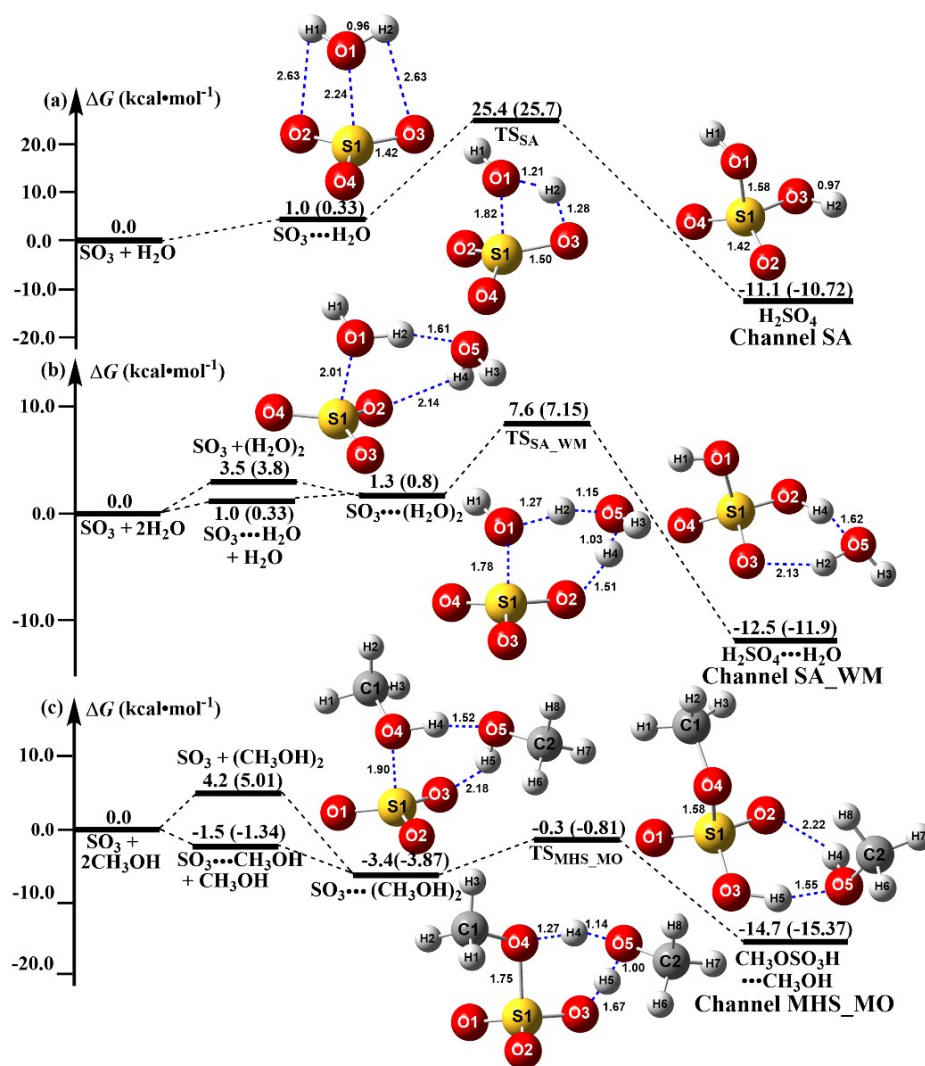

**Fig. S2** Schematic energy diagrams for the hydrolysis of  $\text{SO}_3$  without (a) and with  $\text{H}_2\text{O}$  (b), as well as  $\text{CH}_3\text{OH}$ -assisted  $\text{SO}_3 + \text{CH}_3\text{OH} \rightarrow \text{CH}_3\text{OSO}_3\text{H}$  reaction (c) at the CCSD(T)-F12/cc-pVDZ-F12//M06-2X/6-311+G(2df,2pd) level of theory (The values in parentheses are reported from reference *Chem. Phys. Lett.*, 2013, **581**, 26-29, *J. Phys. Chem. A*, 2017, **121**, 3101-3108)

**Table S1** Relative energies ( $\Delta E$  and  $\Delta(E + ZPE)$ /(kcal·mol<sup>-1</sup>)), enthalpies ( $\Delta H$ /(kcal·mol<sup>-1</sup>)), entropy (S(298 K)/(cal·mol<sup>-1</sup>·K<sup>-1</sup>)) and free energies ( $\Delta G$ (298 K)/(kcal·mol<sup>-1</sup>)) for the reactants, intermediates, transition states and products involved in the SO<sub>3</sub> + CH<sub>3</sub>OH → CH<sub>3</sub>OSO<sub>3</sub>H reaction without and with H<sub>2</sub>O and CH<sub>3</sub>OH as well as the hydrolysis reaction of SO<sub>3</sub> without and with H<sub>2</sub>O and CH<sub>3</sub>OH

| <i>Species</i>                                                     | ZPE  | $\Delta E$ | S     | $\Delta G$                  | $\Delta(E + ZPE)$ | $\Delta H$ |
|--------------------------------------------------------------------|------|------------|-------|-----------------------------|-------------------|------------|
| SO <sub>3</sub> + CH <sub>3</sub> OH                               | 40.6 | 0.0        | 121.4 | 0.0                         | 0.0               | 0.0        |
| SO <sub>3</sub> •••CH <sub>3</sub> OH                              | 42.6 | -13.6      | 87.2  | -2.0 (-1.34) <sup>a</sup>   | -11.6             | -11.9      |
| TS <sub>MHS</sub>                                                  | 40.2 | 9.0        | 79.4  | 19.2 (19.59) <sup>a</sup>   | 8.7               | 7.7        |
| CH <sub>3</sub> OSO <sub>3</sub> H (MHS)                           | 43.0 | -27.4      | 80.9  | -14.7 (15.17) <sup>a</sup>  | -25.0             | -25.7      |
| SO <sub>3</sub> + CH <sub>3</sub> OH + H <sub>2</sub> O            | 54.2 | 0.0        | 166.5 | 0.0                         | 0.0               | 0.0        |
| SO <sub>3</sub> •••H <sub>2</sub> O + CH <sub>3</sub> OH           | 56.5 | -9.4       | 134.1 | 1.0 (0.33) <sup>b</sup>     | -6.9              | -7.6       |
| SO <sub>3</sub> •••CH <sub>3</sub> OH + H <sub>2</sub> O           | 56.2 | -13.6      | 131.7 | -1.5 (-1.34) <sup>a</sup>   | -11.6             | -11.9      |
| CH <sub>3</sub> OH•••H <sub>2</sub> O + SO <sub>3</sub>            | 56.0 | -5.1       | 143.2 | 3.5 (3.68) <sup>a</sup>     | -3.3              | -3.4       |
| SO <sub>3</sub> •••CH <sub>3</sub> OH•••H <sub>2</sub> O           | 58.9 | -27.3      | 94.8  | -2.5 (-2.96) <sup>a</sup>   | -22.6             | -23.9      |
| TS <sub>MHS_WM</sub>                                               | 57.0 | -20.3      | 86.9  | 3.8 (3.66) <sup>a</sup>     | -17.5             | -19.9      |
| CH <sub>3</sub> OSO <sub>3</sub> H•••H <sub>2</sub> O (MHS•••WM)   | 58.9 | -39.7      | 94.3  | -15.0 (-15.40) <sup>a</sup> | -35.0             | -36.5      |
| SO <sub>3</sub> + CH <sub>3</sub> OH + CH <sub>3</sub> OH          | 73.2 | 0.0        | 174.6 | 0.0                         | 0.0               | 0.0        |
| SO <sub>3</sub> •••CH <sub>3</sub> OH + CH <sub>3</sub> OH         | 75.2 | -13.6      | 143.6 | -1.5 (-1.34) <sup>a</sup>   | -11.6             | -11.9      |
| (CH <sub>3</sub> OH) <sub>2</sub> + SO <sub>3</sub>                | 74.7 | -5.6       | 147.3 | 4.2 (5.01) <sup>a</sup>     | -4.1              | -4.0       |
| SO <sub>3</sub> •••(CH <sub>3</sub> OH) <sub>2</sub>               | 77.4 | -29.7      | 101.1 | -3.4 (-3.87) <sup>a</sup>   | -25.5             | -26.3      |
| TS <sub>MHS_MO</sub>                                               | 75.6 | -25.8      | 95.3  | -0.3 (-0.81) <sup>a</sup>   | -23.4             | -25.0      |
| CH <sub>3</sub> OSO <sub>3</sub> H•••CH <sub>3</sub> OH (MHS•••MO) | 77.5 | -41.0      | 100.8 | -14.7 (-15.37) <sup>a</sup> | -36.7             | -37.8      |
| SO <sub>3</sub> + H <sub>2</sub> O                                 | 21.6 | 0.0        | 106.2 | 0.0                         | 0.0               | 0.0        |
| SO <sub>3</sub> •••H <sub>2</sub> O                                | 24.1 | -9.4       | 78.1  | 1.0 (0.33) <sup>b</sup>     | -6.9              | -7.6       |
| TS <sub>SA</sub>                                                   | 22.3 | 15.7       | 70.4  | 25.4 (25.7) <sup>b</sup>    | 16.4              | 14.7       |
| H <sub>2</sub> SO <sub>4</sub> (SA)                                | 25.3 | -23.6      | 71.6  | -11.1 (-10.72) <sup>b</sup> | -20.0             | -21.4      |
| SO <sub>3</sub> + H <sub>2</sub> O + H <sub>2</sub> O              | 35.2 | 0.0        | 151.3 | 0.0                         | 0.0               | 0.0        |
| SO <sub>3</sub> + (H <sub>2</sub> O) <sub>2</sub>                  | 37.4 | -5.0       | 128.8 | 3.5 (3.8) <sup>c</sup>      | -2.5              | -3.2       |
| SO <sub>3</sub> •••H <sub>2</sub> O + H <sub>2</sub> O             | 37.5 | -9.4       | 122.5 | 1.0 (0.33) <sup>b</sup>     | -6.9              | -7.6       |
| SO <sub>3</sub> •••(H <sub>2</sub> O) <sub>2</sub>                 | 40.8 | -21.5      | 87.1  | 1.3 (0.8) <sup>c</sup>      | -15.9             | -17.9      |
| TS <sub>SA_WM</sub>                                                | 39.1 | -14.5      | 82.2  | 7.6 (7.15) <sup>b</sup>     | -10.6             | -13.6      |
| H <sub>2</sub> SO <sub>4</sub> •••H <sub>2</sub> O (SA•••WM)       | 41.1 | -36.0      | 85.1  | -12.5 (-11.9) <sup>c</sup>  | -30.1             | -32.3      |
| SO <sub>3</sub> + CH <sub>3</sub> OH + H <sub>2</sub> O            | 54.2 | 0.0        | 166.5 | 0.0                         | 0.0               | 0.0        |
| SO <sub>3</sub> •••H <sub>2</sub> O + CH <sub>3</sub> OH           | 56.5 | -9.4       | 134.1 | 1.0 (0.33) <sup>c</sup>     | -6.9              | -7.6       |
| SO <sub>3</sub> •••CH <sub>3</sub> OH + H <sub>2</sub> O           | 56.2 | -13.6      | 131.7 | -1.5 (-1.34) <sup>a</sup>   | -11.6             | -11.9      |
| CH <sub>3</sub> OH•••H <sub>2</sub> O + SO <sub>3</sub>            | 56.0 | -5.1       | 143.2 | 3.5 (3.68) <sup>a</sup>     | -3.3              | -3.4       |
| SO <sub>3</sub> •••H <sub>2</sub> O•••CH <sub>3</sub> OH           | 59.1 | -22.9      | 95.1  | 0.8                         | -18.1             | -19.5      |
| TS <sub>SA_MO</sub>                                                | 57.4 | -19.5      | 89.5  | 3.5                         | -16.3             | -18.4      |

|                                                                      |      |       |      |       |       |       |
|----------------------------------------------------------------------|------|-------|------|-------|-------|-------|
| $\text{H}_2\text{SO}_4 \cdots \text{CH}_3\text{OH}$ (SA $\cdots$ MO) | 59.1 | -37.1 | 97.6 | -14.2 | -32.2 | -33.7 |
|----------------------------------------------------------------------|------|-------|------|-------|-------|-------|

---

<sup>a</sup> The values are reported from reference (*Proc. Natl. Acad. Sci. U. S. A.*, 2019, **116**, 24966-24971)

<sup>b</sup> The values are reported from reference (*Chem. Phys. Lett.*, 2013, **581**, 26-29)

<sup>c</sup> The values are reported from reference (*J. Phys. Chem. A*, 2017, **121**, 3101-3108)

**Table S2** Equilibrium constants ( $\text{cm}^3 \cdot \text{molecule}^{-1}$ ) for  $\text{SO}_3 \cdots \text{CH}_3\text{OH}$ ,  $\text{SO}_3 \cdots \text{H}_2\text{O}$ ,  $\text{CH}_3\text{OH} \cdots \text{H}_2\text{O}$ ,  $(\text{H}_2\text{O})_2$  and  $\text{SO}_3 \cdots (\text{H}_2\text{O})_2$  within the altitude range of 0-15 km<sup>a</sup>

| Altitude | T/K    | $\text{SO}_3 \cdots \text{CH}_3\text{OH}$ | $\text{SO}_3 \cdots \text{H}_2\text{O}$              | $\text{CH}_3\text{OH} \cdots \text{H}_2\text{O}$ | $(\text{H}_2\text{O})_2$                             | $\text{SO}_3 \cdots (\text{H}_2\text{O})_2$          |
|----------|--------|-------------------------------------------|------------------------------------------------------|--------------------------------------------------|------------------------------------------------------|------------------------------------------------------|
| 0 km     | 298.15 | $1.07 \times 10^{-18}$                    | $2.69 \times 10^{-21}$<br>$(6.44 \times 10^{-20})^b$ | $1.29 \times 10^{-22}$                           | $2.00 \times 10^{-22}$<br>$(2.34 \times 10^{-21})^c$ | $2.35 \times 10^{-19}$<br>$(6.83 \times 10^{-19})^d$ |
| 5 km     | 259.30 | $1.86 \times 10^{-17}$                    | $1.60 \times 10^{-20}$                               | $2.71 \times 10^{-22}$                           | $3.73 \times 10^{-22}$                               | $2.69 \times 10^{-18}$                               |
| 10 km    | 229.70 | $3.00 \times 10^{-16}$                    | $9.19 \times 10^{-20}$                               | $5.75 \times 10^{-22}$                           | $7.03 \times 10^{-22}$                               | $2.83 \times 10^{-17}$                               |
| 15 km    | 212.60 | $2.21 \times 10^{-15}$                    | $3.23 \times 10^{-19}$                               | $9.98 \times 10^{-22}$                           | $1.12 \times 10^{-21}$                               | $1.51 \times 10^{-16}$                               |

<sup>a</sup> The equilibrium constants ( $\text{cm}^3 \cdot \text{molecule}^{-1}$ ) for the  $\text{SO}_3 \cdots \text{CH}_3\text{OH}$ ,  $\text{SO}_3 \cdots \text{H}_2\text{O}$ ,  $\text{CH}_3\text{OH} \cdots \text{H}_2\text{O}$ ,  $(\text{H}_2\text{O})_2$  and  $\text{SO}_3 \cdots (\text{H}_2\text{O})_2$  complexes involved in Table S2 were performed by ILT method in Mesmer code.

<sup>b</sup> The value was taken from reference (*Chemphyschem.*, 2012, **13**, 323-329)

<sup>c</sup> The value was taken from reference (*J. Am. Chem. Soc.*, 2012, **134**, 20632-20644)

<sup>d</sup> The value was taken from reference (*J. Phys. Chem. A*, 2017, **121**, 3101-3108)

**Table S3** The high-pressure limiting rate coefficient ( $\text{cm}^3 \cdot \text{molecules}^{-1} \cdot \text{s}^{-1}$ ) for the reactants to pre-reactive complex process calculated by master equation within the temperature range of 213-320 K

| $T(\text{K})$ | $\text{SO}_3 + \text{CH}_3\text{OH} \rightarrow \text{SO}_3 \cdots \text{CH}_3\text{OH}$ | $\text{SO}_3 + \text{CH}_3\text{OH} \cdots \text{H}_2\text{O} \rightarrow \text{SO}_3 \cdots \text{CH}_3\text{OH} \cdots \text{H}_2\text{O}$ | $\text{SO}_3 \cdots \text{CH}_3\text{OH} + \text{CH}_3\text{OH} \rightarrow \text{SO}_3 \cdots (\text{CH}_3\text{OH})_2$ |
|---------------|------------------------------------------------------------------------------------------|----------------------------------------------------------------------------------------------------------------------------------------------|--------------------------------------------------------------------------------------------------------------------------|
| 212.60        | $6.20 \times 10^{-11}$                                                                   | $5.09 \times 10^{-11}$                                                                                                                       | $5.86 \times 10^{-11}$                                                                                                   |
| 215.50        | $6.24 \times 10^{-11}$                                                                   | $5.12 \times 10^{-11}$                                                                                                                       | $5.90 \times 10^{-11}$                                                                                                   |
| 218.60        | $6.28 \times 10^{-11}$                                                                   | $5.16 \times 10^{-11}$                                                                                                                       | $5.95 \times 10^{-11}$                                                                                                   |
| 223.70        | $6.36 \times 10^{-11}$                                                                   | $5.22 \times 10^{-11}$                                                                                                                       | $6.01 \times 10^{-11}$                                                                                                   |
| 229.70        | $6.45 \times 10^{-11}$                                                                   | $5.29 \times 10^{-11}$                                                                                                                       | $6.09 \times 10^{-11}$                                                                                                   |
| 235.10        | $6.52 \times 10^{-11}$                                                                   | $5.35 \times 10^{-11}$                                                                                                                       | $6.17 \times 10^{-11}$                                                                                                   |
| 249.90        | $6.72 \times 10^{-11}$                                                                   | $5.52 \times 10^{-11}$                                                                                                                       | $6.36 \times 10^{-11}$                                                                                                   |
| 259.30        | $6.84 \times 10^{-11}$                                                                   | $5.62 \times 10^{-11}$                                                                                                                       | $6.48 \times 10^{-11}$                                                                                                   |
| 266.10        | $6.93 \times 10^{-11}$                                                                   | $5.69 \times 10^{-11}$                                                                                                                       | $6.56 \times 10^{-11}$                                                                                                   |
| 271.00        | $7.00 \times 10^{-11}$                                                                   | $5.74 \times 10^{-11}$                                                                                                                       | $6.62 \times 10^{-11}$                                                                                                   |
| 280.00        | $7.11 \times 10^{-11}$                                                                   | $5.84 \times 10^{-11}$                                                                                                                       | $6.73 \times 10^{-11}$                                                                                                   |
| 290.00        | $7.24 \times 10^{-11}$                                                                   | $5.94 \times 10^{-11}$                                                                                                                       | $6.85 \times 10^{-11}$                                                                                                   |
| 298.15        | $7.34 \times 10^{-11}$                                                                   | $6.02 \times 10^{-11}$                                                                                                                       | $6.94 \times 10^{-11}$                                                                                                   |
| 300.00        | $7.36 \times 10^{-11}$                                                                   | $6.04 \times 10^{-11}$                                                                                                                       | $6.96 \times 10^{-11}$                                                                                                   |
| 310.00        | $7.48 \times 10^{-11}$                                                                   | $6.14 \times 10^{-11}$                                                                                                                       | $7.08 \times 10^{-11}$                                                                                                   |
| 320.00        | $7.60 \times 10^{-11}$                                                                   | $6.24 \times 10^{-11}$                                                                                                                       | $7.19 \times 10^{-11}$                                                                                                   |

  

| $T(\text{K})$ | $\text{SO}_3 + \text{H}_2\text{O} \rightarrow \text{SO}_3 \cdots \text{H}_2\text{O}$ | $\text{SO}_3 \cdots \text{H}_2\text{O} + \text{H}_2\text{O} \rightarrow \text{SO}_3 \cdots (\text{H}_2\text{O})_2$ | $\text{SO}_3 + \text{CH}_3\text{OH} \cdots \text{H}_2\text{O} \rightarrow \text{SO}_3 \cdots \text{H}_2\text{O} \cdots \text{CH}_3\text{OH}$ |
|---------------|--------------------------------------------------------------------------------------|--------------------------------------------------------------------------------------------------------------------|----------------------------------------------------------------------------------------------------------------------------------------------|
| 212.60        | $1.13 \times 10^{-10}$                                                               | $5.41 \times 10^{-11}$                                                                                             | $7.48 \times 10^{-11}$                                                                                                                       |
| 215.50        | $1.13 \times 10^{-10}$                                                               | $5.45 \times 10^{-11}$                                                                                             | $7.53 \times 10^{-11}$                                                                                                                       |
| 218.60        | $1.14 \times 10^{-10}$                                                               | $5.49 \times 10^{-11}$                                                                                             | $7.59 \times 10^{-11}$                                                                                                                       |
| 223.70        | $1.15 \times 10^{-10}$                                                               | $5.55 \times 10^{-11}$                                                                                             | $7.68 \times 10^{-11}$                                                                                                                       |
| 229.70        | $1.17 \times 10^{-10}$                                                               | $5.62 \times 10^{-11}$                                                                                             | $7.78 \times 10^{-11}$                                                                                                                       |
| 235.10        | $1.18 \times 10^{-10}$                                                               | $5.69 \times 10^{-11}$                                                                                             | $7.87 \times 10^{-11}$                                                                                                                       |
| 249.90        | $1.22 \times 10^{-10}$                                                               | $5.87 \times 10^{-11}$                                                                                             | $8.11 \times 10^{-11}$                                                                                                                       |
| 259.30        | $1.24 \times 10^{-10}$                                                               | $5.97 \times 10^{-11}$                                                                                             | $8.26 \times 10^{-11}$                                                                                                                       |
| 266.10        | $1.26 \times 10^{-10}$                                                               | $6.05 \times 10^{-11}$                                                                                             | $8.37 \times 10^{-11}$                                                                                                                       |
| 271.00        | $1.27 \times 10^{-10}$                                                               | $6.11 \times 10^{-11}$                                                                                             | $8.45 \times 10^{-11}$                                                                                                                       |
| 280.00        | $1.29 \times 10^{-10}$                                                               | $6.21 \times 10^{-11}$                                                                                             | $8.59 \times 10^{-11}$                                                                                                                       |
| 290.00        | $1.31 \times 10^{-10}$                                                               | $6.32 \times 10^{-11}$                                                                                             | $8.74 \times 10^{-11}$                                                                                                                       |
| 298.15        | $1.33 \times 10^{-10}$                                                               | $6.40 \times 10^{-11}$                                                                                             | $8.86 \times 10^{-11}$                                                                                                                       |
| 300.00        | $1.34 \times 10^{-10}$                                                               | $6.43 \times 10^{-11}$                                                                                             | $8.89 \times 10^{-11}$                                                                                                                       |
| 310.00        | $1.36 \times 10^{-10}$                                                               | $6.53 \times 10^{-11}$                                                                                             | $9.04 \times 10^{-11}$                                                                                                                       |
| 320.00        | $1.38 \times 10^{-10}$                                                               | $6.64 \times 10^{-11}$                                                                                             | $9.18 \times 10^{-11}$                                                                                                                       |



**Table S4** Rate coefficient ( $\text{cm}^3 \cdot \text{molecules}^{-1} \cdot \text{s}^{-1}$ ) of  $\text{SO}_3 + \text{CH}_3\text{OH}$ ,  $\text{SO}_3 \cdots \text{CH}_3\text{OH} + \text{CH}_3\text{OH}$ ,  $\text{SO}_3 \cdots \text{CH}_3\text{OH} + \text{H}_2\text{O}$ ,  $\text{SO}_3 + \text{H}_2\text{O}$  and  $\text{SO}_3 \cdots \text{H}_2\text{O} + \text{H}_2\text{O}$  reactions within the altitude range of 0-50 km<sup>a</sup>

| $H$ (km) | $T$ (K) | $p$ (Torr) | $k_{\text{MHS}}(T, p)$ | $k_{\text{MHS\_WM}}(T, p)$ | $k_{\text{MHS\_MO}}(T, p)$ | $k_{\text{SA}}(T, p)$                                             | $k_{\text{SA\_WM}}(T, p)$                                         | $k_{\text{SA\_MO}}(T, p)$ |
|----------|---------|------------|------------------------|----------------------------|----------------------------|-------------------------------------------------------------------|-------------------------------------------------------------------|---------------------------|
|          | 280.00  |            | $4.70 \times 10^{-20}$ | $3.91 \times 10^{-12}$     | $2.54 \times 10^{-11}$     | $2.15 \times 10^{-24}$                                            | $1.42 \times 10^{-12}$                                            | $3.05 \times 10^{-12}$    |
|          | 290.00  |            | $5.05 \times 10^{-20}$ | $3.41 \times 10^{-12}$     | $2.34 \times 10^{-11}$     | $2.79 \times 10^{-24}$                                            | $1.25 \times 10^{-12}$                                            | $2.67 \times 10^{-12}$    |
| 0        | 298.15  | 760.00     | $5.40 \times 10^{-20}$ | $3.05 \times 10^{-12}$     | $2.19 \times 10^{-11}$     | $3.53 \times 10^{-24}$<br>( $1.50 \times 10^{-23}$ ) <sup>b</sup> | $1.14 \times 10^{-12}$<br>( $9.70 \times 10^{-13}$ ) <sup>c</sup> | $2.40 \times 10^{-12}$    |
|          | 300.00  |            | $5.50 \times 10^{-20}$ | $2.96 \times 10^{-12}$     | $2.15 \times 10^{-11}$     | $3.75 \times 10^{-24}$                                            | $1.11 \times 10^{-12}$                                            | $2.34 \times 10^{-12}$    |
|          | 310.00  |            | $6.09 \times 10^{-20}$ | $2.58 \times 10^{-12}$     | $1.97 \times 10^{-11}$     | $5.17 \times 10^{-24}$                                            | $9.78 \times 10^{-13}$                                            | $2.05 \times 10^{-12}$    |
|          | 320.00  |            | $6.83 \times 10^{-20}$ | $2.25 \times 10^{-12}$     | $1.79 \times 10^{-11}$     | $7.31 \times 10^{-24}$                                            | $8.63 \times 10^{-13}$                                            | $1.80 \times 10^{-12}$    |
| 5        | 259.30  | 406.60     | $4.39 \times 10^{-20}$ | $5.21 \times 10^{-12}$     | $2.95 \times 10^{-11}$     | $1.39 \times 10^{-24}$                                            | $1.95 \times 10^{-12}$                                            | $4.04 \times 10^{-12}$    |
| 10       | 229.70  | 202.16     | $4.49 \times 10^{-20}$ | $7.70 \times 10^{-12}$     | $3.50 \times 10^{-11}$     | $9.70 \times 10^{-25}$                                            | $2.95 \times 10^{-12}$                                            | $6.06 \times 10^{-12}$    |
| 15       | 212.60  | 91.20      | $4.98 \times 10^{-20}$ | $9.47 \times 10^{-12}$     | $3.76 \times 10^{-11}$     | $8.82 \times 10^{-25}$                                            | $3.74 \times 10^{-12}$                                            | $7.64 \times 10^{-12}$    |
| 20       | 215.50  | 41.04      | $5.21 \times 10^{-20}$ | $8.25 \times 10^{-12}$     | $3.30 \times 10^{-11}$     | $9.01 \times 10^{-25}$                                            | $3.49 \times 10^{-12}$                                            | $7.32 \times 10^{-12}$    |
| 25       | 218.60  | 19.00      | $5.36 \times 10^{-20}$ | $7.82 \times 10^{-12}$     | $2.91 \times 10^{-11}$     | $9.21 \times 10^{-25}$                                            | $3.15 \times 10^{-12}$                                            | $6.97 \times 10^{-12}$    |
| 30       | 223.70  | 8.36       | $5.43 \times 10^{-20}$ | $7.10 \times 10^{-12}$     | $2.34 \times 10^{-11}$     | $9.56 \times 10^{-25}$                                            | $2.69 \times 10^{-12}$                                            | $6.34 \times 10^{-12}$    |
| 35       | 235.10  | 3.80       | $5.30 \times 10^{-20}$ | $4.44 \times 10^{-12}$     | $1.59 \times 10^{-11}$     | $1.05 \times 10^{-24}$                                            | $1.97 \times 10^{-12}$                                            | $4.52 \times 10^{-12}$    |
| 40       | 249.90  | 2.28       | $5.13 \times 10^{-20}$ | $2.26 \times 10^{-12}$     | $1.02 \times 10^{-11}$     | $1.24 \times 10^{-24}$                                            | $1.32 \times 10^{-12}$                                            | $2.30 \times 10^{-12}$    |
| 45       | 266.10  | 1.06       | $5.13 \times 10^{-20}$ | $8.21 \times 10^{-13}$     | $5.18 \times 10^{-12}$     | $1.61 \times 10^{-24}$                                            | $6.89 \times 10^{-13}$                                            | $8.99 \times 10^{-13}$    |
| 50       | 271.00  | 0.55       | $5.17 \times 10^{-20}$ | $4.14 \times 10^{-13}$     | $3.24 \times 10^{-12}$     | $1.78 \times 10^{-24}$                                            | $4.12 \times 10^{-13}$                                            | $4.44 \times 10^{-13}$    |

<sup>a</sup>  $k_{\text{MHS}}$ ,  $k_{\text{MHS\_WM}}$ ,  $k_{\text{MHS\_MO}}$ ,  $k_{\text{SA}}$ ,  $k_{\text{SA\_WM}}$  and  $k_{\text{SA\_MO}}$  are the rate coefficient of Channel MHS, Channel MHS\_WM, Channel MHS\_MO, Channel SA, Channel SA\_WM, and Channel SA\_MO, respectively.

<sup>b</sup> The value was taken from reference (*J. Am. Chem. Soc.*, **2012**, 134, 20632-20644)

<sup>c</sup> The value was taken from reference (*J. Phys. Chem. A*, **2019**, 123, 3131-3141)

The collision energy transfer between the reactive complexes and bath gas ( $\text{N}_2$ ) is approximated by a single exponential down model ( $\langle \Delta E \rangle_{\text{down}} = 150 \text{ cm}^{-1}$ ) and

the one-dimensional asymmetric Eckart potential<sup>1</sup> was applied to tunneling correction in the rate constant calculations involving the typical addition reaction along with the hydrogen atom transfer. In addition, The Lennard-Jones parameters for the SO<sub>3</sub> ( $\epsilon/k_B = 281.1$  K and  $\sigma = 3.13$  Å) and CH<sub>3</sub>OH ( $\epsilon/k_B = 481.8$  K and  $\sigma = 3.63$  Å) were estimated by an empirical method,<sup>2</sup> while the parameters for N<sub>2</sub> was taken from the literature.<sup>3</sup>

## Reference

- [1] C. Eckart, *Phys. Rev.*, 1930, **35**, 1303-1309.
- [2] R. G. Gilbert and S. C. Smith, *Theory of unimolecular and recombination reactions*, Publishers' Business Services, 1990.
- [3] S. H. Robertson, M. J. Pilling, L. C. Jitariu and I. H. Hillier, *Phys. Chem. Chem. Phys.*, 2007, **9**, 4085-4097.

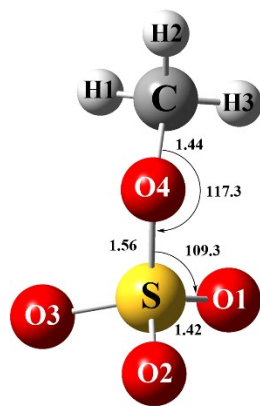

**Fig. S3** The optimized geometrical structure for  $\text{CH}_3\text{OSO}_3^-$  ion at the M06-2X/6-311+G(2df,2pd) level

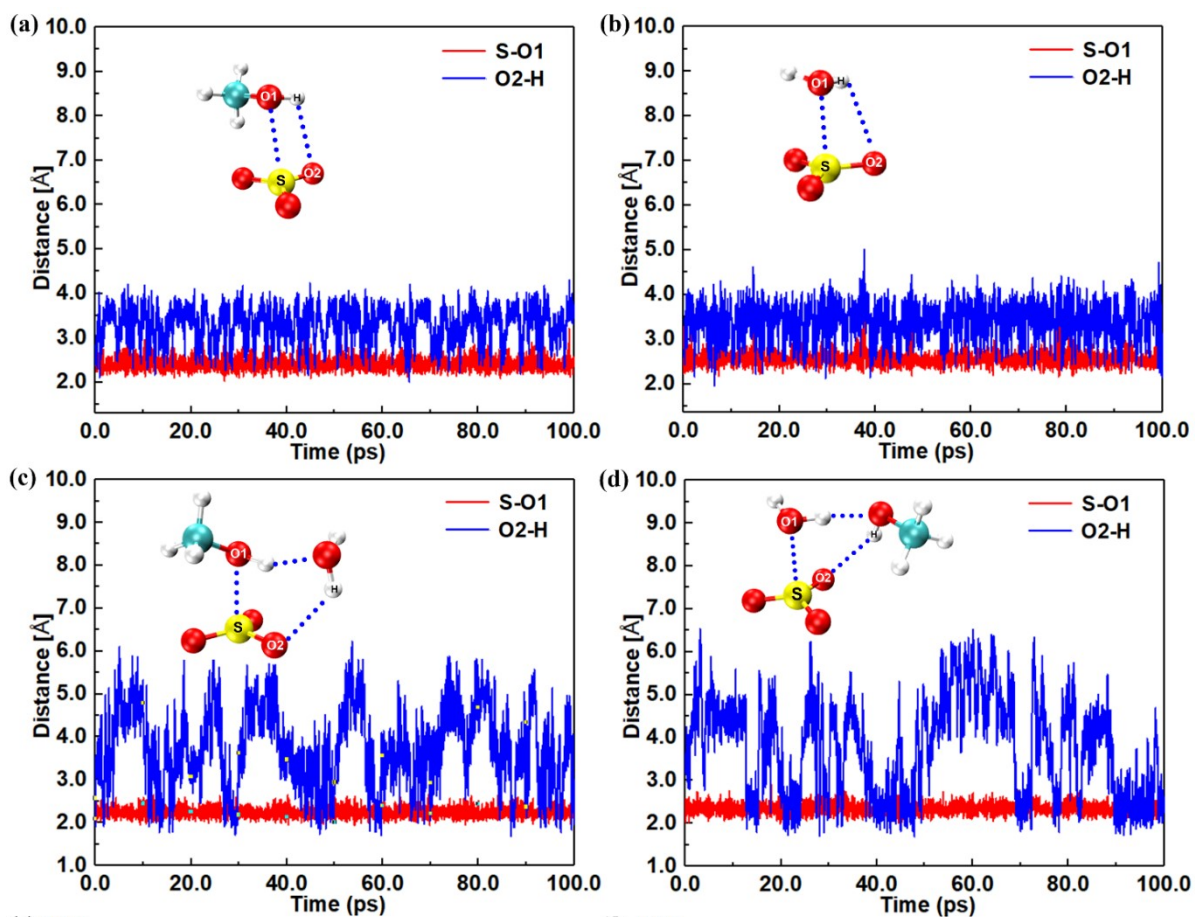

**Fig. S4** The simulated trajectories of SO<sub>3</sub> + CH<sub>3</sub>OH reaction (a), SO<sub>3</sub> + H<sub>2</sub>O reaction (b), H<sub>2</sub>O-assisted SO<sub>3</sub> + CH<sub>3</sub>OH reaction (c) and CH<sub>3</sub>OH-assisted SO<sub>3</sub> + H<sub>2</sub>O reaction (d) in the gas phase

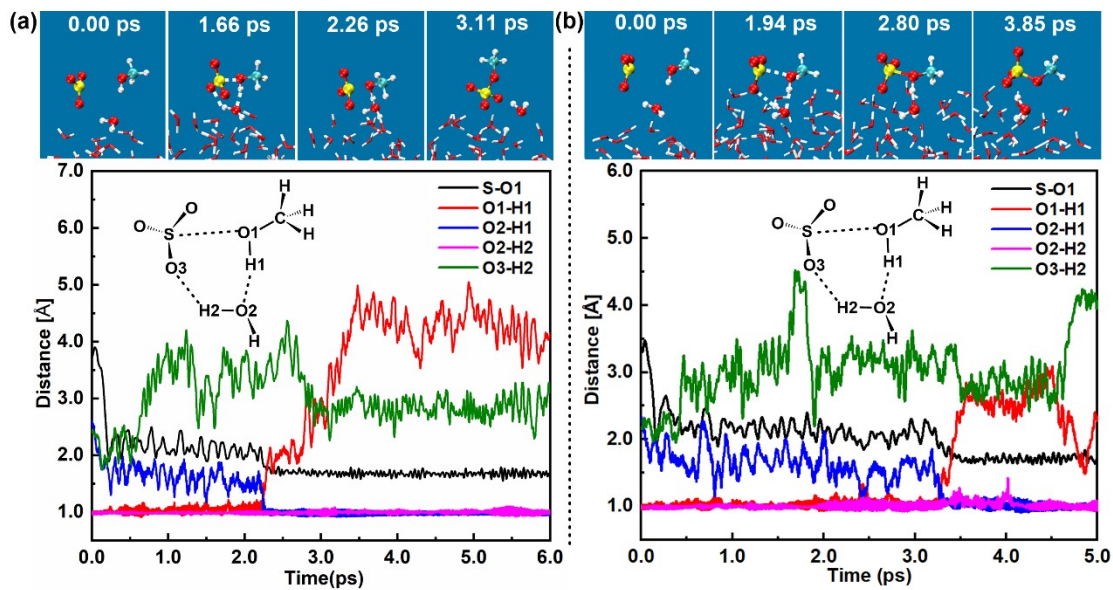

**Fig. S5** The simulated trajectories of the  $\text{CH}_3\text{OSO}_3^- \cdots \text{H}_3\text{O}^+$  ion pair formation from  $\text{SO}_3$ ,  $\text{CH}_3\text{OH}$  and an interfacial water molecule at the air-water interface

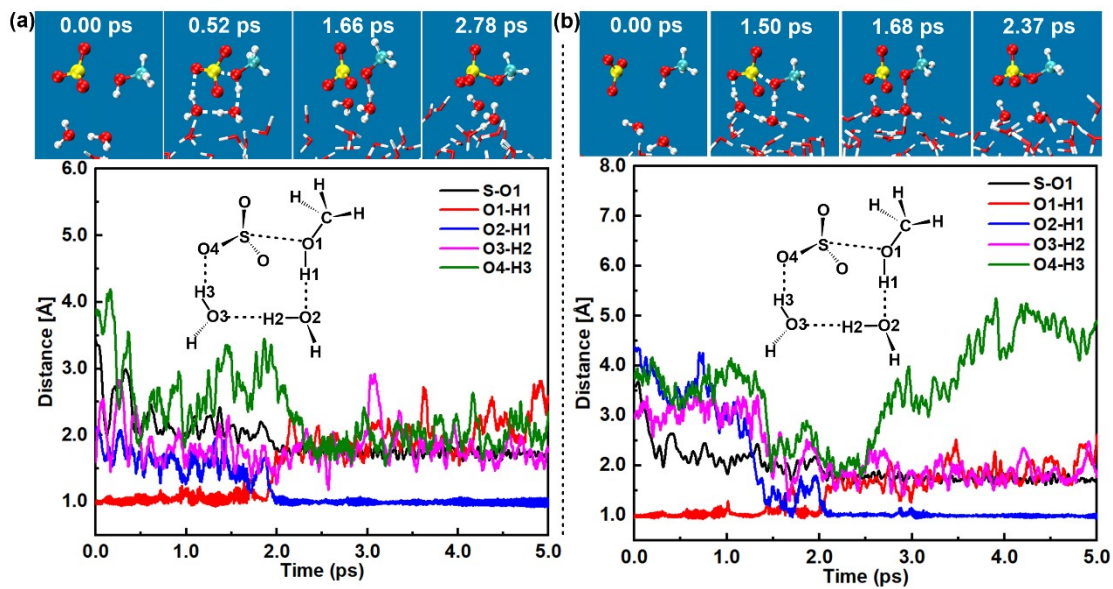

**Fig. S6** The simulated trajectories of the  $\text{CH}_3\text{OSO}_3^- \cdots \text{H}_3\text{O}^+$  ion pair formation from  $\text{SO}_3$ ,  $\text{CH}_3\text{OH}$  and two interfacial water molecular at the air-water interface

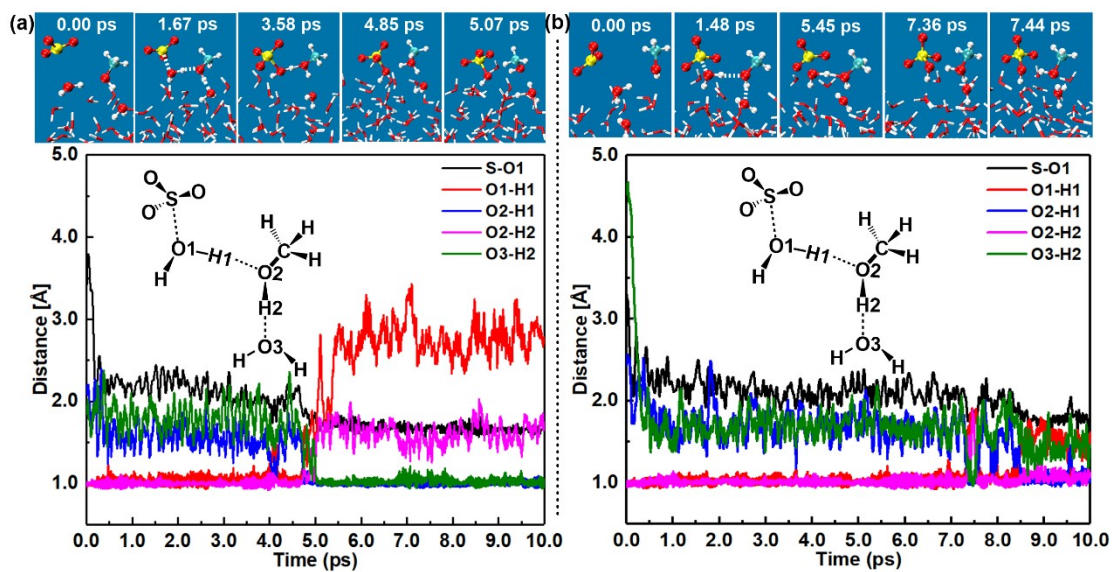

Fig. S7 The simulated trajectories of the  $\text{HSO}_4^-$  and  $\text{H}_3\text{O}^+$  ions formation from  $\text{SO}_3$ ,  $\text{CH}_3\text{OH}$  and an interfacial water molecule at the air-water interface

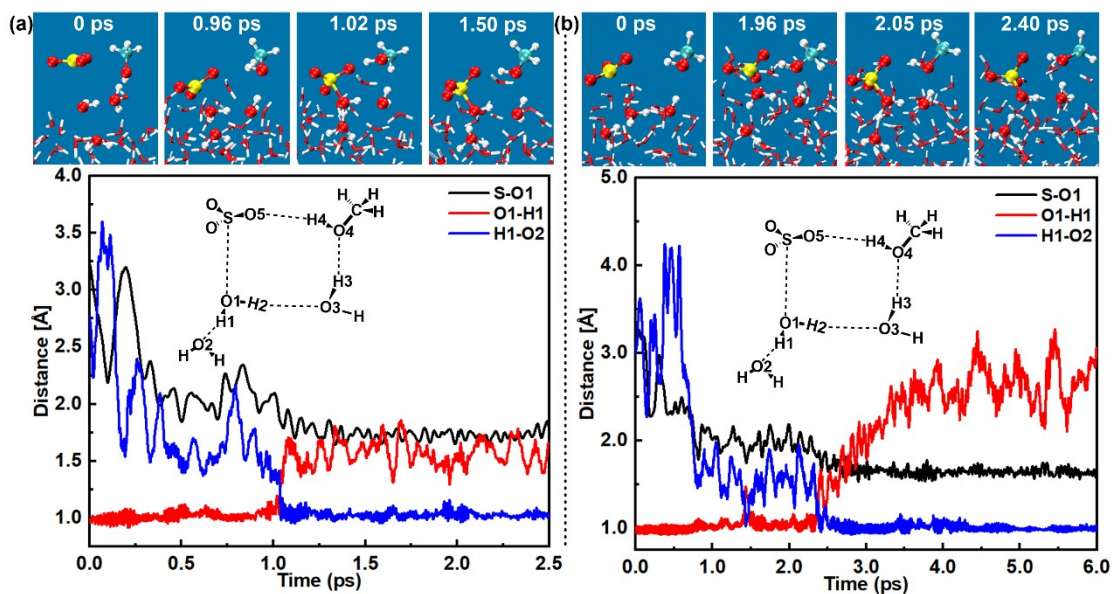

**Fig. S8** The simulated trajectories of the HSO<sub>4</sub><sup>-</sup> and H<sub>3</sub>O<sup>+</sup> ions formation from SO<sub>3</sub>, CH<sub>3</sub>OH and two interfacial water molecules at the air-water interface



**Table S5** Coordinates stationary points for the  $\text{SO}_3 + \text{CH}_3\text{OH} \rightarrow \text{CH}_3\text{OSO}_3\text{H}$  reaction without and with  $\text{H}_2\text{O}$  and  $\text{CH}_3\text{OH}$  as well as the hydrolysis reaction of  $\text{SO}_3$  without and with  $\text{H}_2\text{O}$  and  $\text{CH}_3\text{OH}$  at the M06-2X/6-311+G(2df,2pd) level of theory

|                                                           |             |             |             |                                          |             |             |             |
|-----------------------------------------------------------|-------------|-------------|-------------|------------------------------------------|-------------|-------------|-------------|
| <b>CH<sub>3</sub>OH</b>                                   |             |             |             | <b>SO<sub>3</sub></b>                    |             |             |             |
| C                                                         | -0.66191500 | -0.02063100 | 0.00000900  | S                                        | 0.00000000  | 0.00000000  | 0.00000000  |
| H                                                         | -1.08247700 | 0.98201300  | -0.00019900 | O                                        | 0.00000000  | 1.41906500  | 0.00000000  |
| H                                                         | -1.02028700 | -0.54421200 | 0.88975100  | O                                        | 1.22894600  | -0.70953300 | 0.00000000  |
| H                                                         | -1.02028500 | -0.54457800 | -0.88951800 | O                                        | -1.22894600 | -0.70953300 | 0.00000000  |
| O                                                         | 0.74345100  | 0.12214000  | -0.00002000 |                                          |             |             |             |
| H                                                         | 1.14692600  | -0.74656100 | 0.00006900  |                                          |             |             |             |
| <b>SO<sub>3</sub>•••CH<sub>3</sub>OH</b>                  |             |             |             | <b>TS<sub>MHS</sub></b>                  |             |             |             |
| S                                                         | -0.79785200 | -0.08902400 | 0.01710600  | S                                        | -0.59725800 | -0.09784400 | -0.03361400 |
| O                                                         | -0.74599200 | -0.83876200 | -1.15089800 | O                                        | -0.30038100 | -1.25961100 | -0.79838800 |
| O                                                         | -0.57170000 | -0.71514000 | 1.23934100  | O                                        | -1.38762100 | -0.18829300 | 1.13841000  |
| O                                                         | -1.32780200 | 1.19620800  | -0.00286700 | O                                        | -0.70714300 | 1.18646300  | -0.80498500 |
| C                                                         | 2.38024300  | -0.20767100 | 0.01702800  | C                                        | 2.16367000  | -0.18934700 | 0.12980100  |
| H                                                         | 2.20265800  | -1.07374300 | -0.59873000 | H                                        | 2.12509600  | -1.12201900 | 0.68597800  |
| H                                                         | 2.44268300  | -0.50667300 | 1.05370000  | H                                        | 3.01620600  | 0.40349000  | 0.44693600  |
| H                                                         | 3.29945000  | 0.26923500  | -0.29229800 | H                                        | 2.20323700  | -0.39408600 | -0.93734800 |
| O                                                         | 1.28868900  | 0.67073600  | -0.18867600 | O                                        | 0.98976300  | 0.57102900  | 0.45112200  |
| H                                                         | 1.39381900  | 1.47725200  | 0.28627500  | H                                        | 0.47263100  | 1.33749900  | -0.32581900 |
| <b>CH<sub>3</sub>OSO<sub>3</sub>H (MHS)</b>               |             |             |             | <b>H<sub>2</sub>O</b>                    |             |             |             |
| S                                                         | -0.39118800 | 0.12680500  | 0.07222200  | O                                        | 0.00000000  | 0.00000000  | 0.11651300  |
| O                                                         | -0.41048900 | 1.43740200  | -0.47132100 | H                                        | 0.00000000  | 0.76111400  | -0.46605300 |
| O                                                         | -1.47639700 | -0.71757700 | -0.68754800 | H                                        | 0.00000000  | -0.76111400 | -0.46605300 |
| O                                                         | -0.51998500 | -0.09225400 | 1.47607200  |                                          |             |             |             |
| C                                                         | 2.13819100  | -0.08587600 | -0.02263200 |                                          |             |             |             |
| H                                                         | 2.25015000  | 0.91898400  | -0.42405500 |                                          |             |             |             |
| H                                                         | 2.89714400  | -0.74454500 | -0.42932000 |                                          |             |             |             |
| H                                                         | 2.18829400  | -0.07654000 | 1.06465100  |                                          |             |             |             |
| O                                                         | 0.88259300  | -0.64269000 | -0.45139500 |                                          |             |             |             |
| H                                                         | -1.71148700 | -1.49055500 | -0.15749400 |                                          |             |             |             |
| <b>SO<sub>3</sub>•••H<sub>2</sub>O</b>                    |             |             |             | <b>TS<sub>SA</sub></b>                   |             |             |             |
| S                                                         | -0.41439700 | 0.00002000  | -0.03540800 | S                                        | 0.27132700  | -0.00067200 | 0.06452500  |
| O                                                         | -0.37795000 | 1.22800300  | -0.75287900 | O                                        | 0.66838000  | 1.36069300  | 0.13933400  |
| O                                                         | -0.37800500 | -1.22723400 | -0.75411200 | O                                        | -0.55238000 | -0.51043600 | 1.20835800  |
| O                                                         | -0.75466100 | -0.00066900 | 1.34052100  | O                                        | 1.06391400  | -0.95883200 | -0.60803000 |
| O                                                         | 1.80323900  | -0.00010700 | 0.28179800  | O                                        | -1.33699500 | 0.03116200  | -0.78931900 |
| H                                                         | 2.14467900  | 0.77432100  | -0.17810800 | H                                        | -1.59218200 | 0.94079100  | -0.99582200 |
| H                                                         | 2.14468400  | -0.77459300 | -0.17799200 | H                                        | -1.49239800 | -0.31073500 | 0.36068000  |
| <b>H<sub>2</sub>SO<sub>4</sub></b>                        |             |             |             | <b>CH<sub>3</sub>OH•••H<sub>2</sub>O</b> |             |             |             |
| S                                                         | -0.00000100 | 0.00002000  | -0.15523400 | O                                        | 2.03948900  | -0.22238600 | 0.00118500  |
| O                                                         | 0.65946100  | -1.06404600 | -0.82199900 | H                                        | 2.52767100  | 0.12399700  | -0.74864200 |
| O                                                         | -1.02362400 | -0.67886300 | 0.84002700  | H                                        | 2.44588800  | 0.16951200  | 0.77722900  |
| O                                                         | -0.65947500 | 1.06425200  | -0.82172200 | C                                        | -1.65426300 | -0.37813700 | 0.00204000  |
| O                                                         | 1.02363900  | 0.67865200  | 0.84017800  | H                                        | -2.64484300 | 0.06208400  | 0.09943200  |
| H                                                         | -1.69535900 | -0.03304900 | 1.09594400  | H                                        | -1.50026200 | -1.06115600 | 0.84237300  |
| H                                                         | 1.69536900  | 0.03276900  | 1.09593300  | H                                        | -1.62746600 | -0.95770000 | -0.92530700 |
|                                                           |             |             |             | O                                        | -0.72012700 | 0.67547500  | -0.00342900 |
|                                                           |             |             |             | H                                        | 0.16969100  | 0.30737300  | -0.03937700 |
| <b>SO<sub>3</sub>•••CH<sub>3</sub>OH•••H<sub>2</sub>O</b> |             |             |             | <b>TS<sub>MHS_WM</sub></b>               |             |             |             |
| S                                                         | 0.79643400  | 0.42182200  | -0.05172100 | S                                        | -0.58851400 | -0.49176500 | 0.04309500  |
| O                                                         | 0.05261300  | 1.59408800  | 0.31229900  | O                                        | -1.77645900 | -0.36631200 | -0.73069300 |
| O                                                         | 1.85962600  | -0.00102100 | 0.79205400  | O                                        | -0.66699900 | -0.33530000 | 1.46532300  |
| O                                                         | 0.82936500  | 0.06370400  | -1.43330900 | O                                        | 0.37228100  | -1.50341500 | -0.40945100 |
| C                                                         | -0.39749400 | -2.14851200 | -0.03612700 | H                                        | 2.77094500  | -0.19792400 | 0.82023400  |

|                                                          |             |             |             |                                                           |             |             |             |
|----------------------------------------------------------|-------------|-------------|-------------|-----------------------------------------------------------|-------------|-------------|-------------|
| H                                                        | 0.61040000  | -2.48058400 | 0.19482000  | O                                                         | 2.41978400  | -0.18732500 | -0.07695700 |
| H                                                        | -0.54110600 | -2.10266300 | -1.11264000 | H                                                         | 1.76532000  | -0.98749700 | -0.18634400 |
| H                                                        | -1.12502500 | -2.80445700 | 0.43417200  | H                                                         | 1.54834300  | 0.55461300  | -0.18848300 |
| O                                                        | -0.54032700 | -0.84004600 | 0.53607800  | O                                                         | 0.34766800  | 0.90847200  | -0.42080800 |
| H                                                        | -1.42162200 | -0.40881900 | 0.31734500  | C                                                         | -0.20440600 | 2.16187600  | -0.00237700 |
| O                                                        | -2.53724200 | 0.64154700  | -0.10240400 | H                                                         | 0.44328200  | 2.94137500  | -0.39292100 |
| H                                                        | -1.94020200 | 1.40507500  | -0.12339200 | H                                                         | -1.19941100 | 2.25451000  | -0.43076900 |
| H                                                        | -3.25270300 | 0.86718700  | 0.49624900  | H                                                         | -0.25602200 | 2.20295300  | 1.08371300  |
| <b>CH<sub>3</sub>OSO<sub>3</sub>H•••H<sub>2</sub>O</b>   |             |             |             | <b>SO<sub>3</sub>•••H<sub>2</sub>O•••CH<sub>3</sub>OH</b> |             |             |             |
| S                                                        | -0.21114000 | -0.42161200 | 0.08936400  | S                                                         | -1.05894900 | -0.23644000 | 0.07385700  |
| O                                                        | -1.06633600 | -1.54529400 | 0.24532700  | O                                                         | -2.38292900 | 0.24923200  | -0.08523900 |
| O                                                        | 0.40288300  | 0.16671100  | 1.24991000  | O                                                         | -0.47575200 | -0.26340600 | 1.38135500  |
| O                                                        | 0.86937800  | -0.72536500 | -0.97007800 | O                                                         | -0.52535200 | -1.13372000 | -0.90242400 |
| H                                                        | 2.37042000  | 0.76532000  | 0.81104200  | H                                                         | 1.62826300  | 0.13895600  | 1.18397700  |
| O                                                        | 2.86855300  | 0.61126600  | -0.00385500 | O                                                         | 2.09123000  | 0.53802300  | 0.43484800  |
| H                                                        | 1.70470500  | -0.21342100 | -0.75113900 | H                                                         | 0.87304600  | 1.14983300  | -0.25792800 |
| H                                                        | 3.15485900  | 1.46946500  | -0.32373500 | O                                                         | -0.08843600 | 1.37707500  | -0.51908600 |
| O                                                        | -0.98965500 | 0.71618200  | -0.68360200 | H                                                         | -0.16385400 | 1.44557400  | -1.47821000 |
| C                                                        | -2.18489900 | 1.17476000  | -0.03282500 | C                                                         | 2.78880400  | -0.48418100 | -0.28220200 |
| H                                                        | -2.59283900 | 1.93990700  | -0.68395600 | H                                                         | 2.09481500  | -1.23465900 | -0.66014200 |
| H                                                        | -2.88753400 | 0.35102400  | 0.07257600  | H                                                         | 3.29462900  | 0.00101100  | -1.11227300 |
| H                                                        | -1.94055400 | 1.59694000  | 0.94073300  | H                                                         | 3.53337300  | -0.95020800 | 0.36043800  |
| <b>TS<sub>SA_MO</sub></b>                                |             |             |             | <b>H<sub>2</sub>SO<sub>4</sub>•••CH<sub>3</sub>OH</b>     |             |             |             |
| S                                                        | 0.98272900  | 0.14570100  | 0.11403100  | S                                                         | -0.95927700 | 0.13443900  | 0.09243500  |
| O                                                        | 2.32852000  | -0.28712200 | -0.03645200 | O                                                         | -1.86849600 | 1.22100900  | -0.01799500 |
| O                                                        | 0.29624900  | -0.23119400 | 1.33854400  | O                                                         | -0.00129600 | 0.16808100  | -1.12441800 |
| O                                                        | 0.60266200  | 1.41730500  | -0.43408500 | O                                                         | -0.19062000 | -0.09118700 | 1.27769300  |
| H                                                        | -1.37358300 | -0.55024000 | 0.98780300  | H                                                         | 0.89870200  | -0.22030500 | -0.85002900 |
| O                                                        | -1.96338600 | -0.69453800 | 0.20112300  | O                                                         | 2.18935400  | -0.68091900 | -0.13150400 |
| H                                                        | -1.09217300 | -0.87180600 | -0.52936600 | H                                                         | 1.78259000  | -0.87986000 | 0.72153500  |
| O                                                        | 0.08894700  | -0.95208900 | -0.97645100 | O                                                         | -1.77060100 | -1.20813100 | -0.13363300 |
| H                                                        | 0.25934700  | -0.68295600 | -1.88698500 | H                                                         | -2.52534800 | -1.02716300 | -0.70842100 |
| C                                                        | -2.64786900 | 0.54490100  | -0.10140300 | C                                                         | 3.07126200  | 0.42948700  | 0.03524900  |
| H                                                        | -1.92021400 | 1.34857400  | -0.19780400 | H                                                         | 2.53776100  | 1.29156200  | 0.43659900  |
| H                                                        | -3.18365100 | 0.39069400  | -1.03184000 | H                                                         | 3.89499000  | 0.16487100  | 0.69566700  |
| H                                                        | -3.35011700 | 0.74621100  | 0.70068000  | H                                                         | 3.46542600  | 0.67212100  | -0.94694400 |
| <b>SO<sub>3</sub>•••(CH<sub>3</sub>OH)<sub>2</sub></b>   |             |             |             | <b>TS<sub>MHS_MO</sub></b>                                |             |             |             |
| S                                                        | 0.89885600  | -0.63470500 | 0.05547500  | S                                                         | -0.87208200 | -0.51786100 | 0.08659700  |
| O                                                        | 0.11449600  | -1.51661200 | -0.74699300 | O                                                         | -0.51992300 | -0.39841100 | 1.47515100  |
| O                                                        | 2.26804400  | -0.41194900 | -0.26190900 | O                                                         | -0.07588100 | -1.47996400 | -0.66588700 |
| O                                                        | 0.48886900  | -0.47028800 | 1.42537000  | O                                                         | -2.24400100 | -0.39107200 | -0.27589800 |
| C                                                        | 0.79149500  | 2.16599200  | -0.08475300 | O                                                         | 2.01569800  | -0.03959900 | -0.73117100 |
| H                                                        | 1.83424100  | 2.13904600  | -0.38267700 | H                                                         | 1.47744500  | -0.87925000 | -0.82967500 |
| H                                                        | 0.70631400  | 2.16555800  | 1.00056400  | H                                                         | 1.08300300  | 0.61925200  | -0.66463200 |
| H                                                        | 0.29377000  | 3.03086000  | -0.51430300 | O                                                         | -0.14978900 | 0.93295700  | -0.57978700 |
| O                                                        | 0.17032800  | 0.98717900  | -0.62440200 | C                                                         | -0.59703000 | 2.15164300  | 0.02178900  |
| H                                                        | -0.79473800 | 0.90095100  | -0.29670600 | H                                                         | -0.10872400 | 2.96760500  | -0.50373800 |
| O                                                        | -2.04837900 | 0.47149000  | 0.44810900  | H                                                         | -1.67485300 | 2.21876600  | -0.10535500 |
| H                                                        | -1.63651600 | -0.06563100 | 1.13922300  | H                                                         | -0.34273000 | 2.16105500  | 1.08031100  |
| C                                                        | -2.97406700 | -0.32648900 | -0.29656900 | C                                                         | 2.70857300  | -0.07710400 | 0.53876400  |
| H                                                        | -3.75911500 | -0.69712700 | 0.35989100  | H                                                         | 3.47488200  | -0.84329800 | 0.48089200  |
| H                                                        | -3.41573700 | 0.32273300  | -1.04681000 | H                                                         | 3.16825200  | 0.89579500  | 0.67898600  |
| H                                                        | -2.46135600 | -1.15668500 | -0.78025800 | H                                                         | 1.99794400  | -0.29267400 | 1.33508200  |
| <b>CH<sub>3</sub>OSO<sub>3</sub>H•••CH<sub>3</sub>OH</b> |             |             |             | <b>SO<sub>3</sub>•••(H<sub>2</sub>O)<sub>2</sub></b>      |             |             |             |
| S                                                        | 0.66600300  | -0.49767100 | 0.05300700  | S                                                         | -0.72655600 | -0.21572400 | -0.01563600 |
| O                                                        | -0.34961500 | -1.02126400 | -0.97923900 | O                                                         | 0.02120300  | -0.80276600 | -1.09100900 |
| O                                                        | 1.85871900  | -1.26836700 | 0.00340000  | O                                                         | -1.89767500 | 0.52174300  | -0.33607100 |

|   |                           |             |             |   |                                                     |             |             |
|---|---------------------------|-------------|-------------|---|-----------------------------------------------------|-------------|-------------|
| O | 0.00677500                | -0.29273700 | 1.31506300  | O | -0.55376300                                         | -0.76786200 | 1.28265300  |
| C | 1.98995400                | 1.67395400  | 0.05856600  | H | 2.05659400                                          | -0.77081100 | -0.53575300 |
| H | 2.93019200                | 1.13124300  | -0.01135400 | O | 2.56888200                                          | -0.09325700 | -0.07175700 |
| H | 1.73134300                | 1.85735200  | 1.10050400  | H | 2.94629300                                          | -0.51875200 | 0.70222000  |
| H | 2.05135800                | 2.61071700  | -0.48437500 | H | 1.39094700                                          | 0.96571600  | 0.17856200  |
| O | 0.94646600                | 0.92561900  | -0.58354500 | O | 0.47412400                                          | 1.36639800  | 0.26262700  |
| H | -2.18149200               | -0.49186100 | 1.01231500  | H | 0.32889200                                          | 1.98137700  | -0.46639600 |
| O | -2.55910500               | -0.39310800 | 0.12879100  |   |                                                     |             |             |
| H | -1.29146600               | -0.82846700 | -0.64506900 |   |                                                     |             |             |
| C | -2.76511200               | 0.99917500  | -0.11338900 |   |                                                     |             |             |
| H | -3.15976200               | 1.09115400  | -1.12093200 |   |                                                     |             |             |
| H | -3.48711600               | 1.40607700  | 0.59252400  |   |                                                     |             |             |
| H | -1.82407600               | 1.54660000  | -0.03854200 |   |                                                     |             |             |
|   | <b>TS<sub>SA_WM</sub></b> |             |             |   | <b>H<sub>2</sub>SO<sub>4</sub>•••H<sub>2</sub>O</b> |             |             |
| S | -0.65233100               | -0.14510200 | -0.01916500 | S | 0.57588500                                          | -0.07535900 | 0.12343300  |
| O | -0.85657300               | -0.74621700 | 1.25457600  | O | 1.74940700                                          | -0.86585200 | 0.24755800  |
| O | 0.25182400                | -0.88475000 | -0.90835700 | O | 0.97143100                                          | 1.29314100  | -0.56891300 |
| O | -1.71014300               | 0.55338700  | -0.66930800 | H | 1.72836900                                          | 1.14588600  | -1.15045300 |
| H | 1.69307800                | -0.64037300 | -0.52213900 | O | -0.21323400                                         | 0.29783800  | 1.25530000  |
| O | 2.40341600                | -0.02626900 | -0.08883100 | O | -0.34398900                                         | -0.74592400 | -0.93380500 |
| H | 2.80197100                | -0.47821400 | 0.66311400  | H | -1.29425100                                         | -0.47807300 | -0.76000900 |
| H | 1.59301500                | 0.72374100  | 0.23889900  | O | -2.65960000                                         | 0.10211100  | -0.11057600 |
| O | 0.43244100                | 1.19840900  | 0.41778900  | H | -2.27974800                                         | 0.36435100  | 0.73887300  |
| H | 0.18151000                | 1.95999800  | -0.12018200 | H | -3.40065300                                         | -0.47694900 | 0.08014600  |
